# Supplementary material for: Flexible solid-state supercapacitors based on a conducting polymer hydrogel with enhanced electrochemical performance
Source: Royal Society of Chemistry journal article supplement (doi:10.1039/c4ta04924a), 2014-01-01
Supplement: c4ta04924a1.pdf [file c4ta04924a1.pdf]

Electronic Supplementary Material (ESI) for Journal of Materials Chemistry A.

This journal is © The Royal Society of Chemistry 2014

*Electronic Supplementary Information (ESI) for:*

**Flexible Solid-State Supercapacitors Based on Conducting Polymer Hydrogel  
with Enhanced Electrochemical Performance**

*Kai Wang \*, Xiong Zhang, Chen Li, Haitao Zhang, Xianzhong Sun, Nansheng Xu and  
Yanwei Ma \**

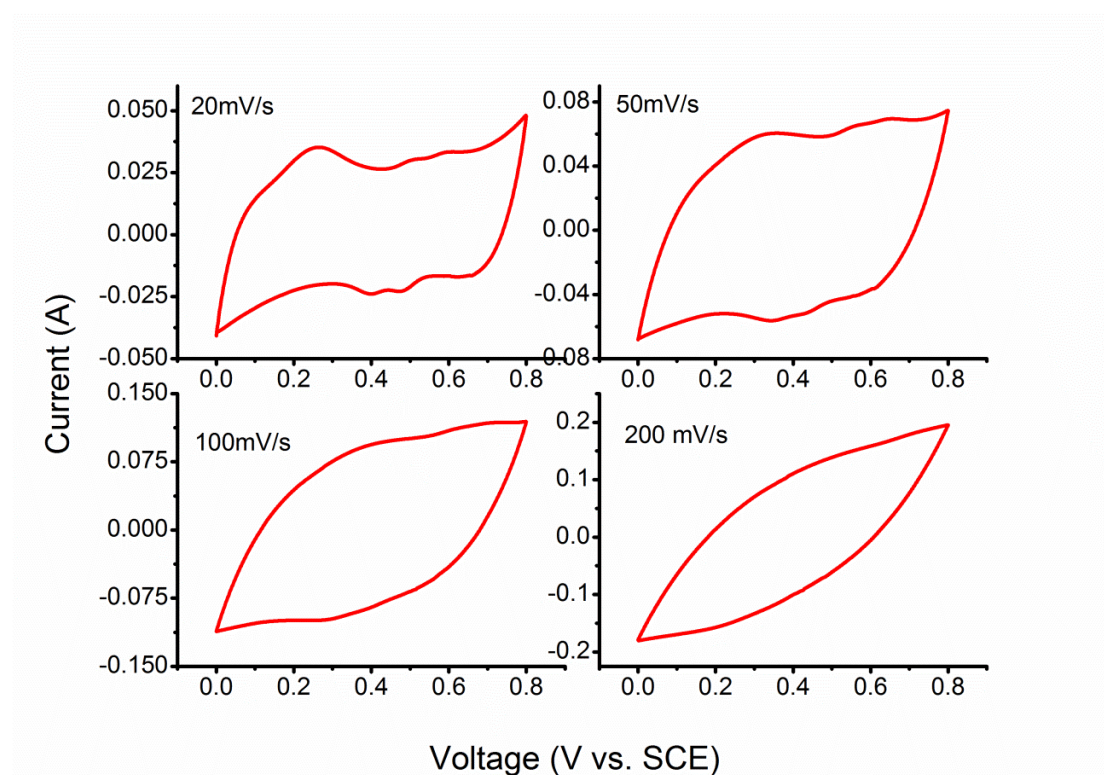

Figure S1 CV curves of CFC supported PANI hydrogel electrode at different scanning rates( 20, 50, 100 and 200 mV/s) with a three-electrode configuration in 1 M H<sub>2</sub>SO<sub>4</sub> aqueous solution, where the counter and reference electrode are Pt plate and SCE electrode, respectively.

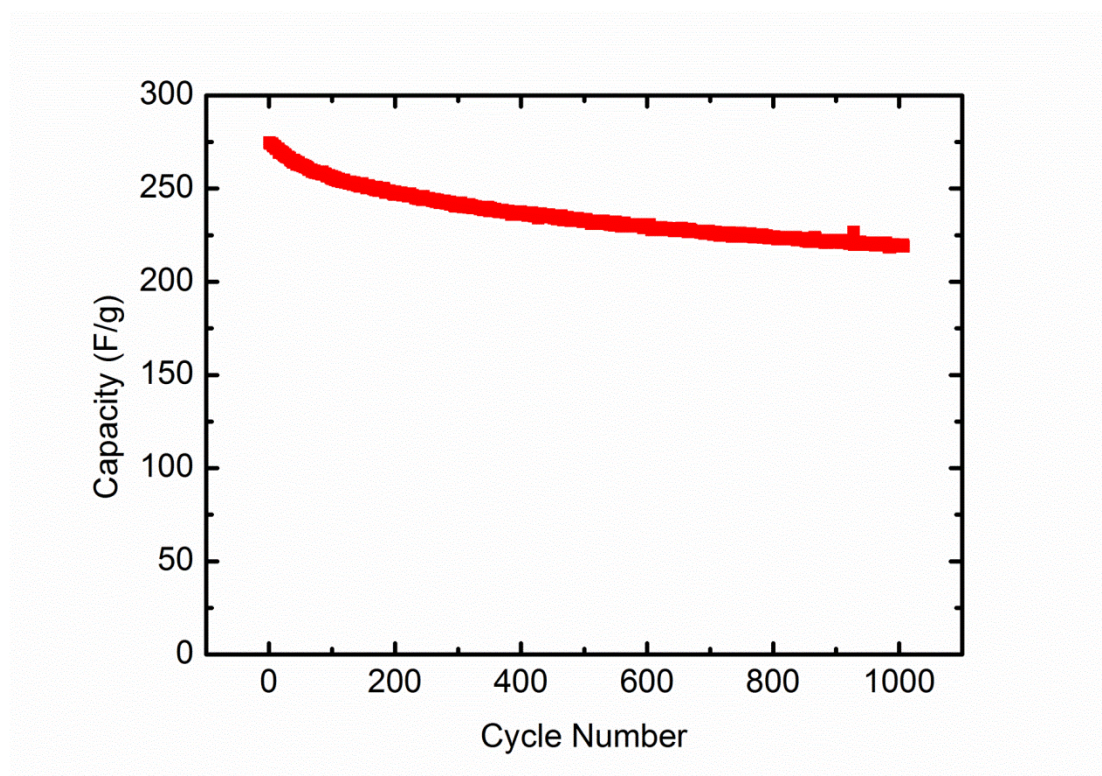

Figure S2 Capacitance decay plots of single PANI hydrogel electrode obtained from galvanostatic charge-discharge tests at 40 mA with a three-electrode configuration in 1 M H<sub>2</sub>SO<sub>4</sub> aqueous solution, where the counter and reference electrode are Pt plate and SCE electrode, respectively. After 1000 cycles, the capacitance can keep 80%.

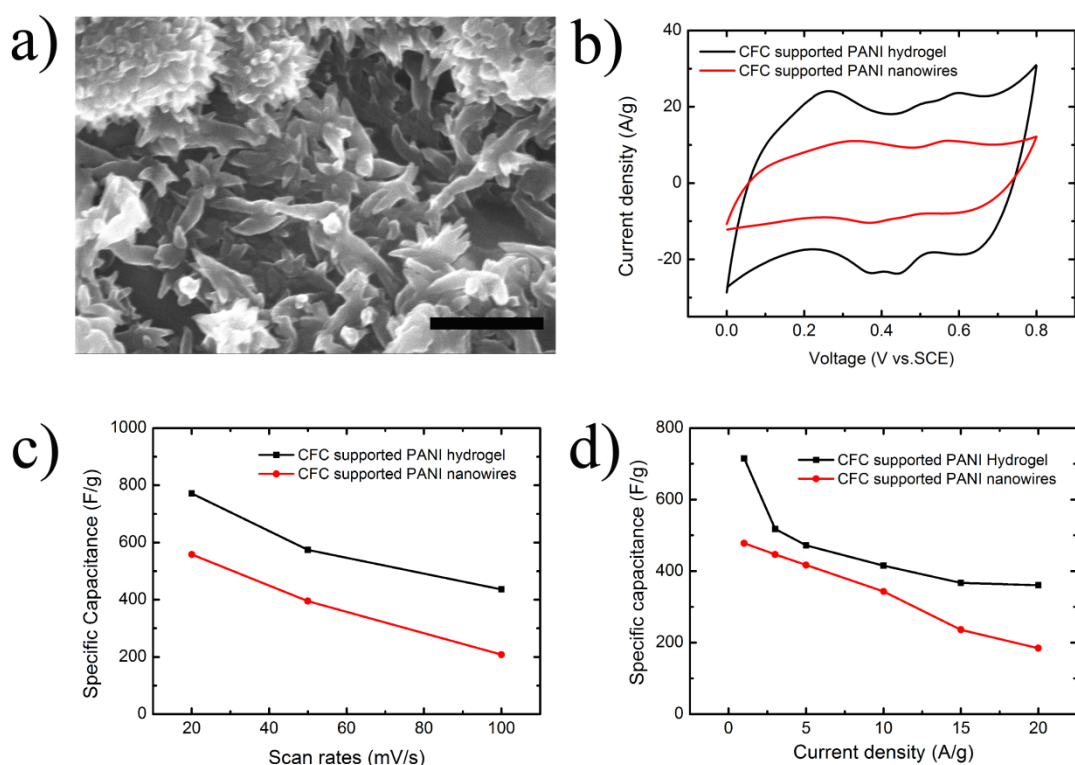

Figure S3 a) The morphology of common PANI nanowire electrode on CFC surface, the scale bar is 500nm; b) CVs at 20mV/s of CFC supported PANI hydrogel electrode and CFC supported common PANI nanowire electrode with three-electrode system; c) Specific capacitance plots at different scanning rates with three-electrode system; d) Specific capacitance plots at different scanning rates at different current densities with three-electrode system.

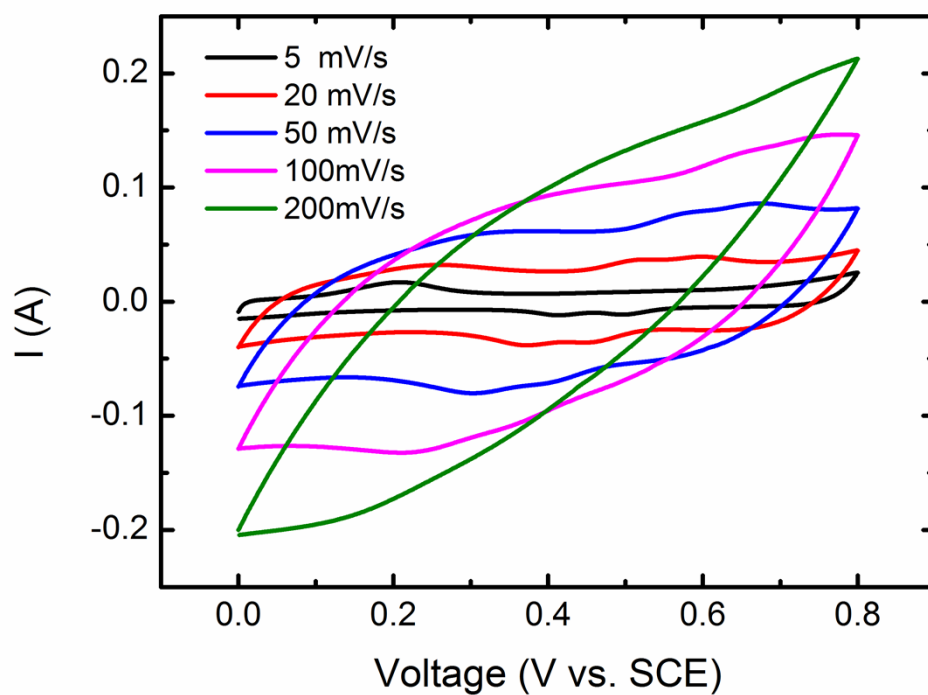

Figure S4 CV curves of the flexible solid-state supercapacitors with symmetric two-electrode configuration at different scanning rates( 5, 20, 50, 100 and 200 mV/s).

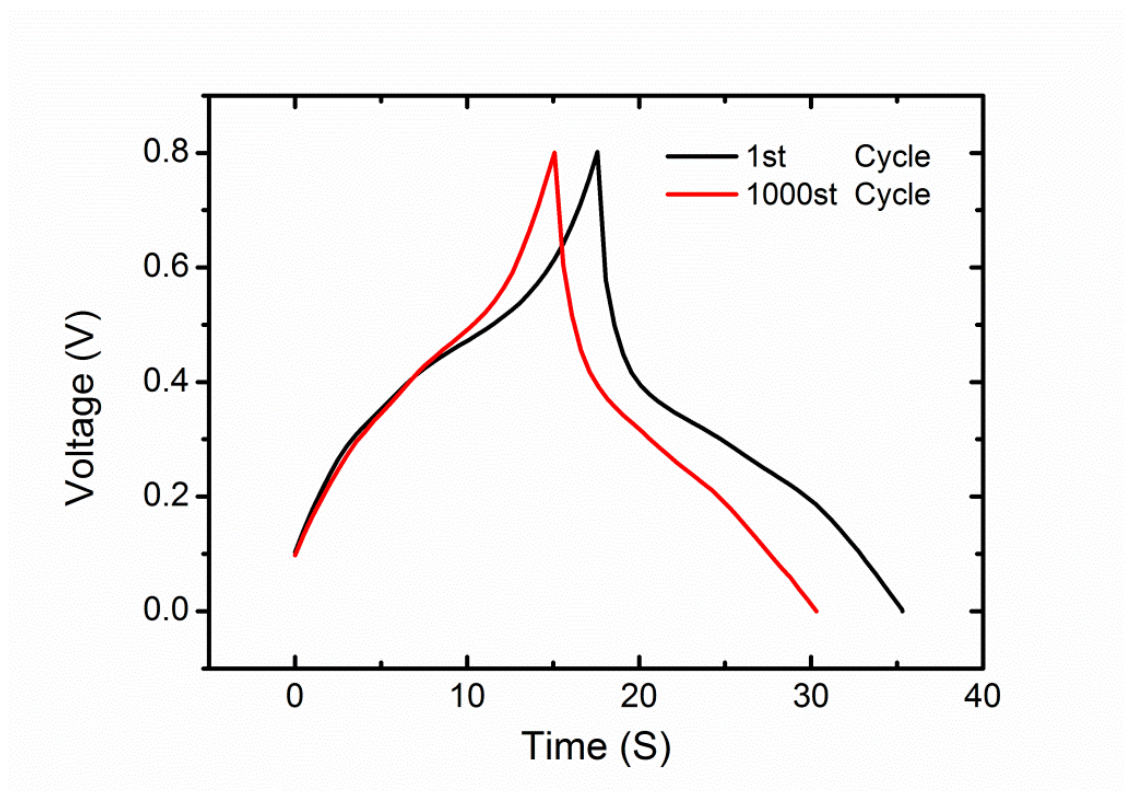

Figure S5 Galvanostatic charge-discharge (GCD) measurements: the GCD curve of the 1<sup>st</sup> cycle and the 1000<sup>th</sup> cycle, which shows the capacitance has only a minor decay.
